# Supplementary material for: Short peptide analogs as alternatives to collagen in pro-regenerative corneal implants
Source: PubMed Central journal article supplement (PMC5842042; doi:10.1016/j.actbio.2018.01.011), 2018-03-15

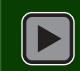

Supplement: mmc4.pdf [file mmc4.pdf]
